# Supplementary material for: An Abies Extract Containing Nonvolatile Polyphenols Shows Virucidal Activity against SARS-CoV-2 That Is Enhanced in Increased pH Conditions
Source: MDPI journal article supplement (doi:10.3390/pathogens12091093), 2023-08-28
Supplement: s1 [file s1]

Supplementary Materials for **An *Abies* extract containing nonvolatile polyphenols shows virucidal activity against SARS-CoV-2 that is enhanced in increased pH conditions**

Imane Maaroufi<sup>1</sup>, Dulamjav Jamsransuren<sup>2</sup>, Koh Hashida<sup>3</sup>, Sachiko Matsuda<sup>2</sup>, Haruko Ogawa<sup>4</sup> and Yohei Takeda<sup>2,4,\*</sup>

<sup>1</sup> Graduate School of Animal and Veterinary Sciences and Agriculture, Obihiro University of Agriculture and Veterinary Medicine, Obihiro 080-8555, Japan; imanemaaroufivet@gmail.com

<sup>2</sup> Research Center for Global Agromedicine, Obihiro University of Agriculture and Veterinary Medicine, Obihiro 080-8555, Japan; jduuya@obihiro.ac.jp (D.J.); chaka@obihiro.ac.jp (S.M.); ytakeda@obihiro.ac.jp (Y.T.)

<sup>3</sup> Department of Forest Resources Chemistry, Forestry and Forest Products Research Institute, Tsukuba 305-8687, Japan; koh@ffpri.affrc.go.jp (K.H.)

<sup>4</sup> Department of Veterinary Medicine, Obihiro University of Agriculture and Veterinary Medicine, Obihiro 080-8555, Japan; hogawa@obihiro.ac.jp (H.O.)

\* Correspondence: ytakeda@obihiro.ac.jp; Tel.: +81-155-49-5896

**Supplementary Figure**

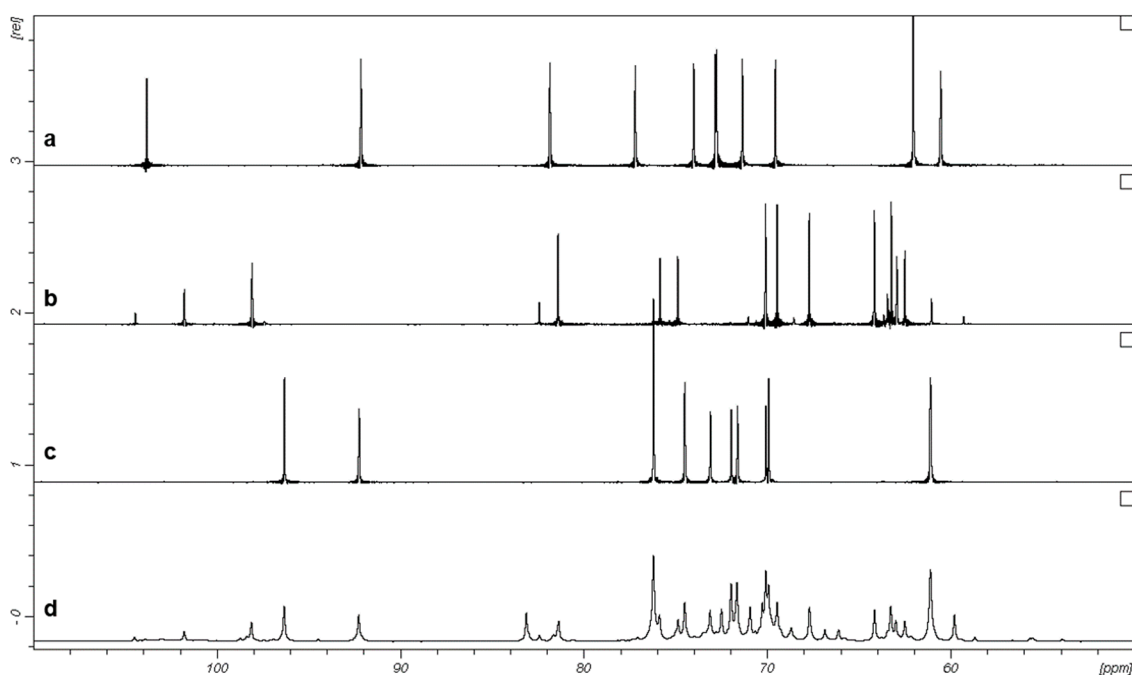

**Figure S1.** <sup>13</sup>C–NMR spectra of sucrose (a), fructose (b), glucose (c), and H<sub>2</sub>O eluates from ASE2 (d).
